# Supplementary material for: Sustained Inflation Reduces Pulmonary Blood Flow during Resuscitation with an Intact Cord
Source: MDPI journal article supplement (doi:10.3390/children8050353), 2021-04-29
Supplement: s1 [file s1]

*Table S1. Subgroup Without Arrest- Primary Outcomes.*

|                                         | <b>ECC+V<br/>(n=3)</b> | <b>ECC+SI<br/>(n=3)</b> | <b>DCC<br/>(n=3)</b> | <b>DCC+V<br/>(n=3)</b> | <b>DCC+SI<br/>(n=3)</b> |
|-----------------------------------------|------------------------|-------------------------|----------------------|------------------------|-------------------------|
| Time to reach baseline Ca<br>flow (sec) | 25 ± 18*               | 138 ± 44                | 236±166              | 135 ± 129              | 131 ± 124               |
| Time to HR>100 (sec)                    | 92 ± 86                | 46 ± 21                 | 138±87               | 125 ± 113              | 107 ± 66                |
| Time to mean BP>40<br>mmHg(sec)         | 178 ± 261              | 180 ± 103               | 355±224              | 221 ± 263              | 123 ± 80                |
